# Supplementary material for: Thermal analysis of ice and glass transitions in insects that do and do not survive freezing
Source: Oxford University Press journal article supplement (doi:10.1242/jeb.170464), 2018-01-01
Supplement: jeb170464supp.pdf [file jeb170464supp.pdf]

**Table S1. Summary of literature data on maximum ice fraction in various invertebrates.**

| Species and taxonomic affiliation                | Geographic origin and acclimation status             | IF <sub>max</sub> * (% TBW) | Reference                  |                             |
|--------------------------------------------------|------------------------------------------------------|-----------------------------|----------------------------|-----------------------------|
| <b>Insecta</b>                                   |                                                      |                             |                            |                             |
| <i>Eleodes blanchardi</i> (Coleoptera)           | Norway, field-collected, overwintering adult         | 75                          | Zachariassen et al., 1979  |                             |
| <i>Eurosta solidaginis</i> (Diptera)             | Ohio, New York, field-collected, overwintering larva | 64                          | Lee and Lewis, 1985        |                             |
| <i>Hemideina maori</i> (Orthoptera)              | New Zealand, field-collected, cold acclimated        | 82                          | Ramlov and Westh, 1993     |                             |
| <i>Melasoma collaris</i> (Coleoptera)            | Norway, field-collected, cold acclimated             | 77                          | Gehrken and Southon, 1997  |                             |
|                                                  | <i>ibid.</i> , warm-acclimated in lab.               | 84.5                        |                            |                             |
| <i>Celatoblatta quinque maculata</i> (Blattodea) | New Zealand, field-collected, overwintering adult    | 74                          | Block et al., 1998         |                             |
| <i>Heleomyza borealis</i> (Diptera)              | Arctics, field-collected, overwintering larva        | 81                          | Worland et al., 2000       |                             |
| <b>Tardigrada</b>                                |                                                      |                             |                            |                             |
| <i>Adorybiotus coronifer</i>                     | Greenland, field-collected in winter                 | 79                          | Westh and Kristensen, 1992 |                             |
|                                                  | Greenland, field-collected in summer                 | 89                          |                            |                             |
|                                                  | <i>ibid.</i> , cold-acclimated in lab.               | 83                          |                            |                             |
| <i>Amphibolus nebulosus</i>                      | Greenland, field-collected in summer                 | 88                          | Halberg et al., 2009       |                             |
| <i>Halobiotus crispae</i>                        | Denmark, field collected, active stage               | 69                          |                            |                             |
|                                                  | <i>ibid.</i> , diapause P1 stage                     | 59                          |                            |                             |
| <i>Macrobiotus sapiens</i>                       | Croatia, lab culture, active, starved                | 84.5                        | Hengherr et al., 2009      |                             |
|                                                  | <i>ibid.</i> , cold-acclimated                       | 81.1                        |                            |                             |
| <i>Paramacrobiotus richtersi</i>                 | Germany, lab culture, active, starved                | 85.7                        | Hengherr et al., 2009      |                             |
|                                                  | <i>ibid.</i> , cold-acclimated                       | 82.5                        |                            |                             |
| <i>Macrobiotus tonollii</i>                      | Oregon, lab culture, active, starved                 | 86.4                        |                            |                             |
|                                                  | <i>ibid.</i> , cold-acclimated                       | 81.2                        |                            |                             |
| <i>Milnesium tardigradum</i>                     | Germany, lab culture, active, starved                | 85.1                        |                            |                             |
|                                                  | <i>ibid.</i> , cold-acclimated                       | 80.5                        |                            |                             |
| <i>Echinscus granulatus</i>                      | Germany, field-collected, active, fed                | 83.8                        |                            |                             |
|                                                  | <i>ibid.</i> , cold-acclimated                       | 78.0                        |                            |                             |
| <i>Echinscus testudo</i>                         | Germany, field-collected, active, fed                | 84.3                        |                            |                             |
|                                                  | <i>ibid.</i> , cold-acclimated                       | 80.5                        |                            |                             |
| <b>Nematoda</b>                                  |                                                      |                             |                            |                             |
| <i>Panagrolaimus davidi</i>                      | Antarctics, lab culture, warm-acclimated,            | 82                          |                            | Wharton and Block, 1997     |
| <b>Anelida</b>                                   |                                                      |                             |                            |                             |
| <i>Buchholzia apendiculata</i>                   | Austria, field-collected, spring active              | 18.1                        |                            | Block and Bauer, 2000       |
| <i>Buchholzia simplex</i>                        |                                                      | 60.1                        |                            |                             |
| <i>Enchytraeus buchholzi</i>                     |                                                      | 17.0                        |                            |                             |
| <i>Enchytraeus albidus</i>                       |                                                      | 64.3                        |                            |                             |
| <i>Henlea ventriculosa</i>                       |                                                      | 40.1                        |                            |                             |
| <i>Fridericia tubulosa</i>                       |                                                      | 65.6                        |                            |                             |
| <i>Enchytraeus albidus</i>                       | Germany, lab culture, acclimated to 5°C              | 61.4                        |                            | Patricio Silva et al., 2013 |
|                                                  | Greenland, lab culture, acclimated to 5°C            | 58.8                        |                            |                             |

\* The IF<sub>max</sub> was measured by gradual layer calorimetry (Zachariassen et al., 1979), or by a custom-made calorimeter registering heat absorbed during melting of frozen sample (Lee and Lewis, 1985), or by differential scanning calorimetry (DSC, most other studies). The <sup>1</sup>H nuclear magnetic resonance was used to determine the amount of unfrozen water in one study (Gehrken and Southon, 1997).

**Table S2. Optimization of cryopreservation protocol for *Chymomyza costata* larvae.**

| Assay                                                                                                                                | Parameter value                                           | n (replicates) | Survival (%) |         |        |
|--------------------------------------------------------------------------------------------------------------------------------------|-----------------------------------------------------------|----------------|--------------|---------|--------|
|                                                                                                                                      |                                                           |                | larvae       | puparia | adults |
| Control 1:                                                                                                                           | manipulation only                                         | 233 (4)        | 100          | 92,0    | 85,6   |
| Control 2:                                                                                                                           | freezing only:<br>-30°C / 1h                              | 100 (2)        | 100          | 87,0    | 76,0   |
| <b>Cryopreservation protocols with variable values of assessed parameters:</b>                                                       |                                                           |                |              |         |        |
| Rate $r_1$                                                                                                                           | 1,5°C / min                                               | 80 (1)         | 55,0         | 0       | 0      |
|                                                                                                                                      | 1°C / min                                                 | 60 (1)         | 35,0         | 0       | 0      |
|                                                                                                                                      | 0,5°C / min                                               | 60 (1)         | 73,4         | 13,3    | 6,7    |
|                                                                                                                                      | 0,25°C / min                                              | 60 (1)         | 76,7         | 13,3    | 11,7   |
|                                                                                                                                      | 0,17°C / min                                              | 60 (1)         | 95,0         | 28,3    | 23,3   |
|                                                                                                                                      | 0,10°C / min                                              | 440 (7)        | 96,8         | 53,6    | 39,3   |
|                                                                                                                                      | 0,05°C / min                                              | 60 (1)         | 83,3         | 28,3    | 13,3   |
| Rate $r_2$                                                                                                                           | 2 - 4°C / sec                                             | 440 (7)        | 96,8         | 53,6    | 39,3   |
|                                                                                                                                      | 10 - 20°C / sec*                                          | 50 (1)         | 56,0         | 22,0    | 10,0   |
|                                                                                                                                      | 20 - 60°C / sec**                                         | 20 (1)         | 45,0         | 0       | 0      |
| Rate $r_3$                                                                                                                           | not assessed, maintained invariably between 1 - 2°C / sec |                |              |         |        |
| Rate $r_4$                                                                                                                           | 0,1°C / min                                               | 300 (3)        | 97,4         | 55,7    | 39,8   |
|                                                                                                                                      | 0,2°C / min                                               | 60 (1)         | 98,4         | 43,3    | 30,0   |
|                                                                                                                                      | 0,6°C / min                                               | 440 (7)        | 96,8         | 53,6    | 39,3   |
|                                                                                                                                      | 1,2°C / min                                               | 60 (1)         | 92,4         | 15,0    | 0      |
| Temperature $T_1$                                                                                                                    | -5°C                                                      | 60 (1)         | 0            | 0       | 0      |
|                                                                                                                                      | -5°C*                                                     | 30 (1)         | 0            | 0       | 0      |
|                                                                                                                                      | -10°C                                                     | 60 (1)         | 0            | 0       | 0      |
|                                                                                                                                      | -15°C                                                     | 80 (1)         | 0            | 0       | 0      |
|                                                                                                                                      | -20°C                                                     | 269 (4)        | 16,3         | 0       | 0      |
|                                                                                                                                      | -22°C                                                     | 120 (2)        | 68,4         | 7,5     | 5,9    |
|                                                                                                                                      | -24°C                                                     | 220 (3)        | 79,5         | 10,6    | 7,8    |
|                                                                                                                                      | -26°C                                                     | 220 (3)        | 92,6         | 13,4    | 8,9    |
|                                                                                                                                      | -28°C                                                     | 120 (2)        | 98,4         | 10,0    | 5,9    |
|                                                                                                                                      | -30°C                                                     | 440 (7)        | 96,8         | 53,6    | 39,3   |
|                                                                                                                                      | -35°C                                                     | 160 (2)        | 100,0        | 45,7    | 28,2   |
|                                                                                                                                      | -40°C                                                     | 340 (4)        | 98,1         | 23,7    | 15,2   |
| Temperature $T_2$                                                                                                                    | -30°C                                                     | 440 (7)        | 96,8         | 53,6    | 39,3   |
|                                                                                                                                      | -20°C                                                     | 60 (1)         | 100,0        | 31,7    | 23,3   |
|                                                                                                                                      | -10°C                                                     | 280 (3)        | 95,4         | 63,8    | 39,9   |
|                                                                                                                                      | -5°C                                                      | 60 (1)         | 96,7         | 5,0     | 1,7    |
|                                                                                                                                      | 0°C                                                       | 60 (1)         | 78,3         | 0       | 0      |
|                                                                                                                                      | r.t.                                                      | 40 (1)         | 65,0         | 0       | 0      |
| <b>Storage of <i>C. costata</i> larvae in LN<sub>2</sub> (cryopreserved using the optimal protocol) for various periods of time:</b> |                                                           |                |              |         |        |
| Assay                                                                                                                                | Storage time                                              | n (replicates) | larvae       | puparia | adults |
| Optimal protocol                                                                                                                     | 1 hour                                                    | 440 (7)        | 96,8         | 53,6    | 39,3   |
|                                                                                                                                      | 2 months                                                  | 40 (1)         | 97,5         | 57,5    | 42,5   |
|                                                                                                                                      | 4 months                                                  | 80 (1)         | 95,0         | 22,5    | 10,0   |
|                                                                                                                                      | 6 months                                                  | 40 (1)         | 97,5         | 55,0    | 42,5   |
|                                                                                                                                      | 9 months                                                  | 180 (1)        | 97,2         | 20,6    | 13,3   |
|                                                                                                                                      | 18 months                                                 | 160 (1)        | 92,5         | 13,8    | 5,6    |

n, total number of larvae assessed. Number of biological replicates is shown in parentheses. Generally, variation in adult survival was relatively high not only between generations (biological replicates) but also between replicated tubes of the same generation (technical replicates). For instance, the optimal protocol assay was replicated in (7) different generations with the following results (mean±S.D., range): larvae, 96.8±1.9, 93.3-98.8; puparia, 53.5±12.3, 41.7-70.0; adults, 39.4±13.5, 11.7-58.3. Because most other treatments were replicated only once or few times, we show final survival as a percentage of survivors from all individuals (generations pooled).

\*, larvae placed into copper capillary (5 cm long, 1.2 mm inner diameter, filled with distilled water), plunged to LN<sub>2</sub>

\*\*, larvae placed into copper capillary, plunged to liquid propane held at -196°C

All parameters were assessed one by one. The values of the assessed parameter varied as shown in the Table (left column), while all other parameters were kept optimal. The optimal protocol is highlighted in blue.

**Table S3. Metabolomic profiles in *Chymomyza costata* larvae of four acclimation variants.**

|                | LD     |      | SD     |       | SDA    |       | LD Pro50 |       |
|----------------|--------|------|--------|-------|--------|-------|----------|-------|
| 3-Alanine      | 1,19   | 0,00 | t      |       | t      |       | t        |       |
| Alanine        | 6,69   | 0,54 | 6,98   | 0,48  | 3,42   | 0,12  | 4,26     | 0,67  |
| Arginine       | 6,68   | 0,75 | 6,43   | 0,14  | 7,84   | 0,62  | 6,19     | 0,81  |
| Asparagine     | 4,91   | 0,24 | 20,92  | 1,97  | 17,38  | 1,70  | 15,52    | 1,15  |
| Aspartate      | 0,27   | 0,03 | 0,24   | 0,01  | t      |       | 0,71     | 0,10  |
| Cysteine       | 0,34   | 0,05 | t      |       | t      |       | t        |       |
| Glutamine      | 19,43  | 1,24 | 120,61 | 10,05 | 24,96  | 5,12  | 153,89   | 57,83 |
| Glutamate      | 8,63   | 0,47 | 5,47   | 0,35  | 6,26   | 0,26  | 7,55     | 0,76  |
| Glycine        | 1,69   | 0,17 | 0,60   | 0,10  | 1,35   | 0,09  | 0,49     | 0,07  |
| Histidine      | 7,23   | 0,79 | 1,53   | 0,23  | 2,07   | 0,32  | t        |       |
| Isoleucine     | 1,10   | 0,18 | 0,64   | 0,03  | 0,59   | 0,05  | 0,74     | 0,04  |
| Leucine        | 1,21   | 0,17 | 0,76   | 0,08  | 0,67   | 0,06  | 0,76     | 0,06  |
| Lysine         | 1,72   | 0,30 | 3,50   | 0,46  | 1,57   | 0,14  | 1,06     | 0,24  |
| Methionine     | 0,36   | 0,05 | t      |       | t      |       | t        |       |
| Phenylalanine  | 0,88   | 0,02 | 0,57   | 0,05  | 0,63   | 0,04  | 0,75     | 0,08  |
| Proline        | 31,41  | 2,11 | 161,75 | 12,75 | 339,08 | 19,31 | 487,02   | 22,95 |
| Serine         | 1,91   | 0,25 | 2,12   | 0,31  | 1,48   | 0,15  | 1,22     | 0,19  |
| Threonine      | 3,31   | 0,48 | 0,62   | 0,13  | 0,64   | 0,05  | 1,17     | 0,15  |
| Tryptophan     | 0,62   | 0,07 | 1,32   | 0,16  | 0,72   | 0,06  | 0,52     | 0,08  |
| Tyrosine       | 5,55   | 0,93 | 3,17   | 0,04  | 2,58   | 0,20  | 2,11     | 0,37  |
| Valine         | 2,18   | 0,26 | 1,01   | 0,04  | 0,84   | 0,13  | 1,08     | 0,23  |
| Ornithine      | 0,26   | 0,02 | 0,31   | 0,06  | t      |       | t        |       |
| Sarcosine      | 0,34   | 0,03 | 0,25   | 0,05  | 0,38   | 0,04  | 0,00     | 0,00  |
| Citrate        | 3,87   | 0,36 | 6,96   | 0,29  | 4,46   | 0,50  | 6,31     | 1,16  |
| Ketoglutarate  | t      |      | 0,73   | 0,14  | t      |       | t        |       |
| Malate         | 2,17   | 0,19 | 1,60   | 0,06  | 0,99   | 0,11  | 2,51     | 0,16  |
| Succinate      | 1,23   | 0,35 | t      |       | t      |       | t        |       |
| Lactate        | 2,95   | 0,18 | 2,29   | 2,24  | 0,58   | 0,10  | t        |       |
| Glycerol       | 0,19   | 0,01 | 0,16   | 0,02  | 0,23   | 0,04  | 0,32     | 0,13  |
| Erythritol     | 0,04   | 0,00 | 0,14   | 0,01  | 0,18   | 0,04  | 0,29     | 0,08  |
| Mannitol       | t      |      | 0,05   | 0,01  | 0,04   | 0,00  | 0,18     | 0,08  |
| Sorbitol       | t      |      | 0,47   | 0,04  | 0,60   | 0,03  | 2,28     | 0,81  |
| chiro-Inositol | 0,21   | 0,02 | 0,16   | 0,01  | 0,30   | 0,02  | 0,23     | 0,05  |
| myo-Inositol   | 0,13   | 0,01 | 0,09   | 0,01  | 0,12   | 0,01  | 0,22     | 0,02  |
| Fructose       | 0,37   | 0,02 | 0,68   | 0,02  | 0,77   | 0,08  | 1,43     | 0,37  |
| Glucose        | 2,05   | 0,32 | 0,40   | 0,06  | 0,37   | 0,04  | 0,61     | 0,10  |
| Trehalose      | 23,54  | 3,25 | 22,87  | 1,31  | 52,36  | 3,61  | 50,55    | 1,01  |
| <b>Total</b>   | 143,62 | 9,76 | 374,29 | 27,73 | 473,48 | 24,85 | 749,98   | 80,54 |

Each value represents mean  $\pm$  S.D. of four biological replicates (each consisting of a pool of 5 larvae). All data are expressed as mmol.kg<sup>-1</sup> TBW. Three most abundant metabolites are highlighted in yellow fields. t, traces of metabolite present (below the threshold for reliable quantitation).

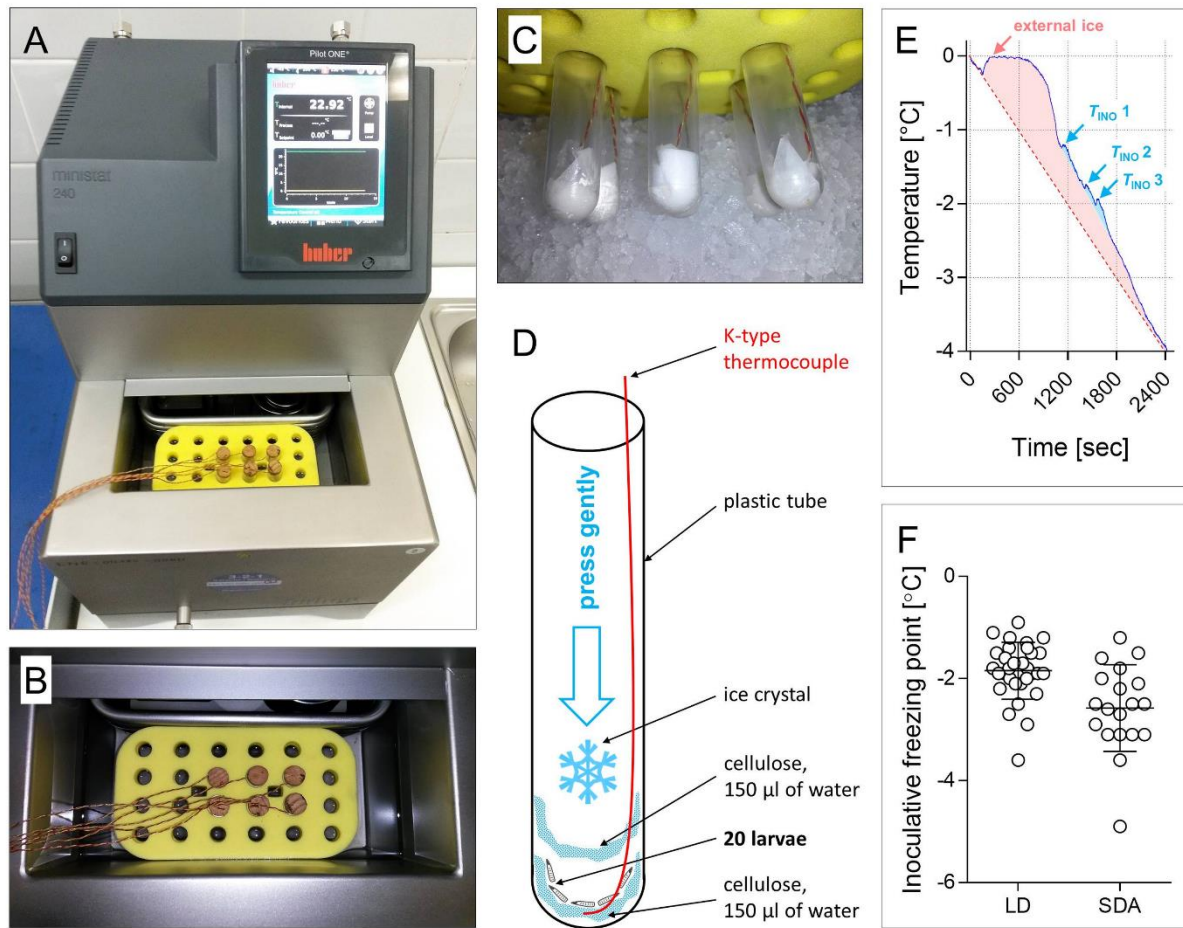

**Fig. S1. Ice nucleation of larval body fluids with external ice crystals in Ministat 240 cooling circulator, Huber.**

(A-C) Photographs show placement of six plastic test tubes (1 cm in diam., 5 cm long), each containing different number of larvae (5 – 20) depending on experiment, inside the Huber Ministat. The tubes were inserted into holes of a floating island and submerged to cooling medium (ThermoFluid SilOil, M60 115/200.05, Huber). (D) Schematic view of the arrangements inside each plastic test tube. Larvae were placed on a small piece of cellulose (75 mg) that was moistened with 150  $\mu$ L of distilled water. Similar piece of moistened cellulose was placed over the larvae and slightly pressed, which ensured that all larvae were in a tight contact with moisture. The thermocouple was mounted in between the two pieces of cellulose. A small ice crystal was added on top of wet cellulose, the tube was closed using cork plug and temperature program was started in Huber Ministat. (E) An example of temperature record (PicoLog TC-08 datalogger) in an experiment where five larvae of *Chymomyza costata* (acclimation variant LD) were slowly cooled (cooling rate  $0.1^{\circ}\text{C min}^{-1}$ ) in the tube arranged as described on D. Large freeze exotherm (red area) belongs to external water in cellulose. Three small freeze exotherms (blue areas) were detected, which belong to three larvae seeded by external ice crystals. (F) Results of replicated experiments as described in E. The *Chymomyza costata* larvae of two acclimation variants were measured: LD ( $n = 40$ ), SDA ( $n = 25$ ) (see Table 1 for detailed description of acclimation variants). All recorded larval freeze exotherms (inoculation freezing points,  $T_{\text{INO}}$ ) are shown: LD ( $n = 31$ ; mean =  $-1.85$ ; S.D. =  $0.56$ ), SDA ( $n = 19$ ; mean =  $-2.58$ ; S.D. =  $0.85$ ), the means of LD and SDA group are statistically different (t-test,  $t = 3.680$ ,  $P = 0.0006$ ).

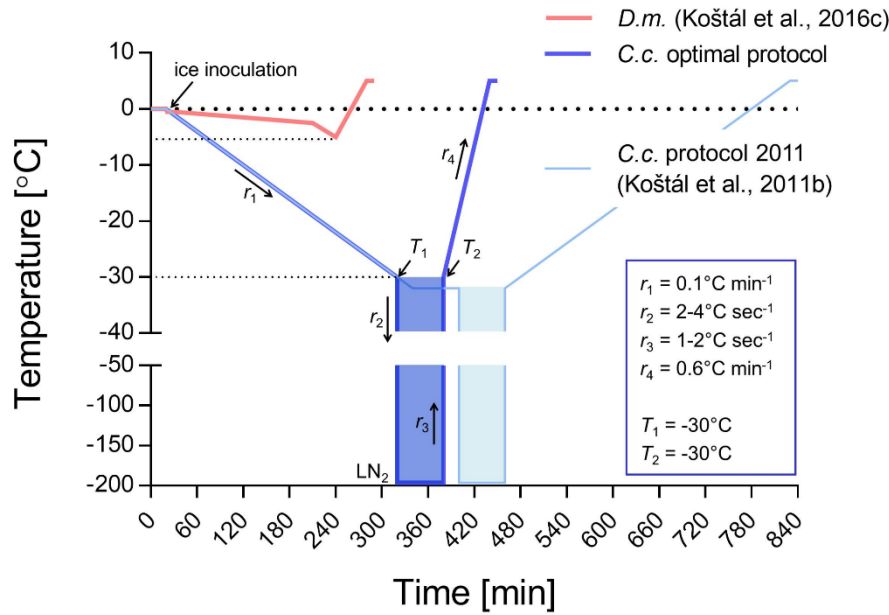

**Fig. S2. Freezing and cryopreservation protocols.**

In all protocols, larval freezing was initiated by contact with external ice crystals (ice inoculation) at relatively high sub-zero temperatures (see Fig. S1). The protocol used for larvae of *Drosophila melanogaster* (*D.m.*, red line) was previously optimized and published in Košťál et al. (2016). The protocol used previously for cryopreservation of larvae of *Chymomyza costata* (*C.c.*, pale blue line, Košťál et al., 2011) was further optimized in this study (Table S1) and the optimum parameters (ensuring the highest survival of adults) are listed in the blue frame and shown graphically as dark blue line (the rates of cooling/heating are shown as  $r_1$ ,  $r_2$ ,  $r_3$  and  $r_4$ . At temperature  $T_1$ , frozen larvae are plunged into liquid nitrogen ( $LN_2$ ), and, later, returned to Huber Ministat pre-set to  $T_2$  temperature).

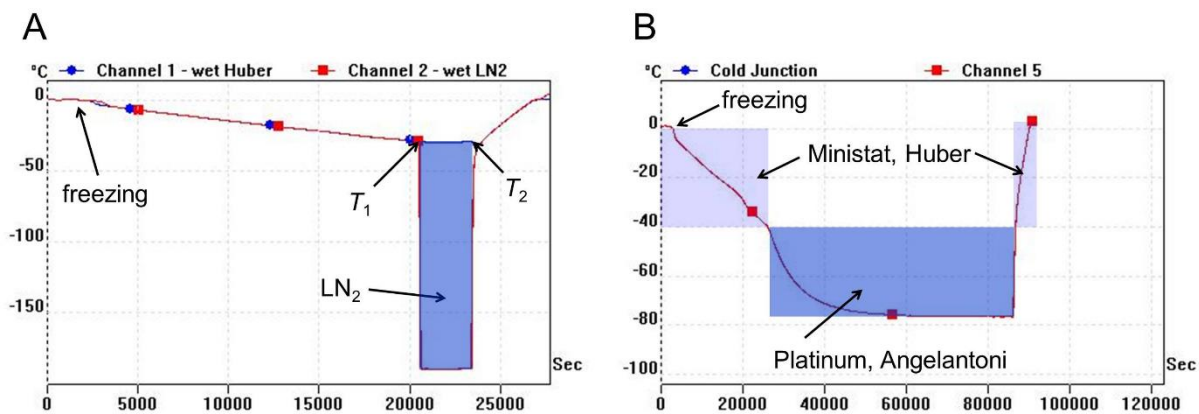

**Fig. S3. Examples of temperature record from PicoLog TC-08 datalogger.**

(A) Freezing to  $-30^\circ\text{C}$  / 1h (Channel 1, blue line) and freezing to a  $T_1 = -30^\circ\text{C}$  followed by 1h in liquid nitrogen ( $LN_2$ , Channel 2, red line). Note that both channels show freeze exotherms (water in the cellulose wrapping) extending over approximately 1st hour of slow cooling (rate  $0.1^\circ\text{C min}^{-1}$ ). External ice crystals inoculate larvae inside the wrapping (see Fig. S1 E). (B) Slow freezing to  $-40^\circ\text{C}$  in Ministat (Huber) followed by transfer to Platinum freezer (Angelantoni), where the sample gradually cooled to  $-75^\circ\text{C}$  (Channel 5, red line).

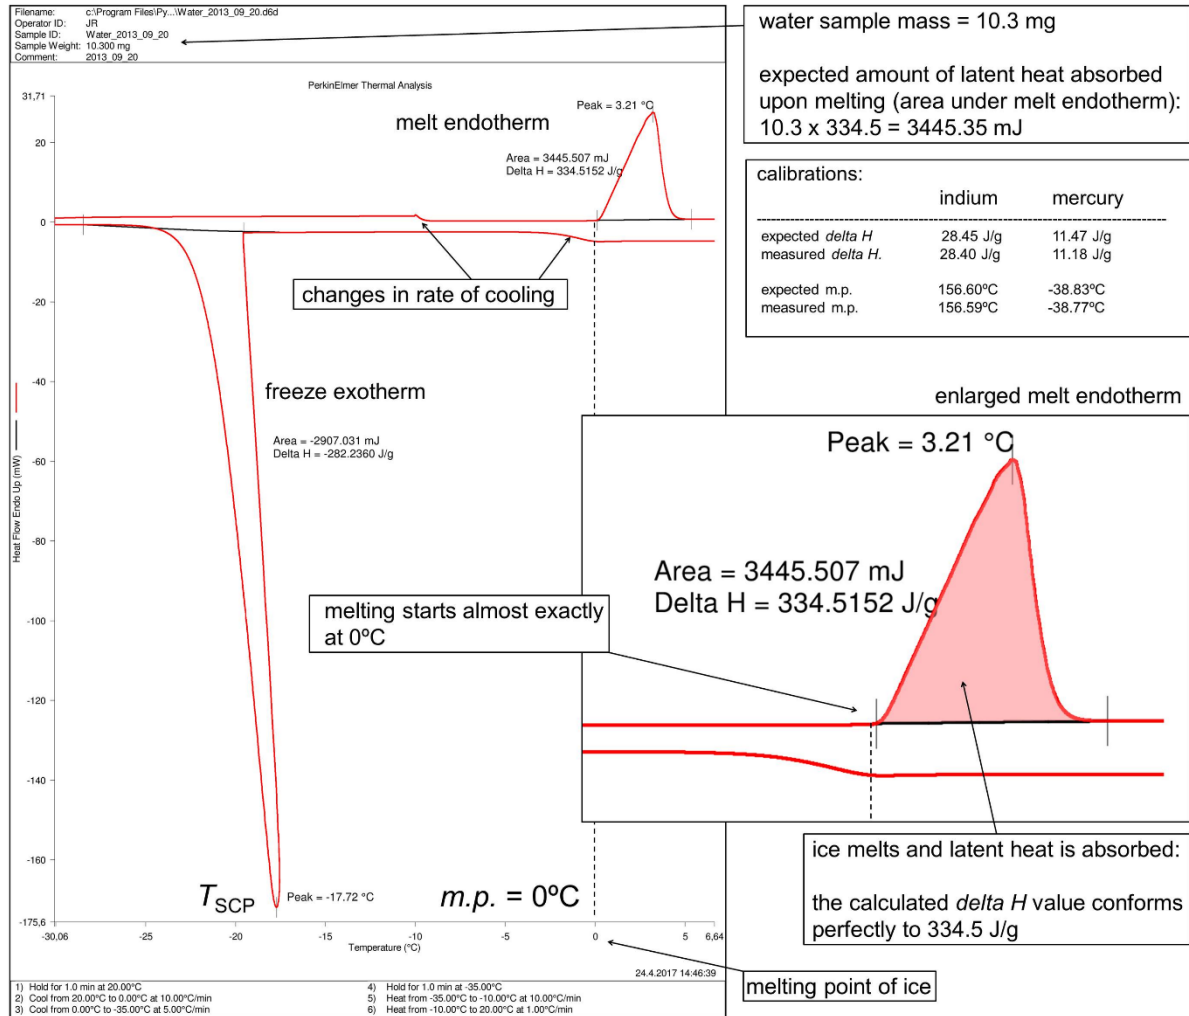

Fig. S4. DSC calibration: example protocol (distilled water).

The temperature scale and the heat flow of DSC4000 instrument were calibrated using indium, mercury and distilled water standards. Calibration parameters for indium and mercury are shown in the frame (right). An example protocol (left) shows that running the thermal analysis of distilled water sample (10.3 mg) returns expected values of melting point (m.p., 0 °C) and specific enthalpy of ice/water transition ( $\Delta H$ , 334.5 J g<sup>-1</sup>) (Wang and Weller, 2011).

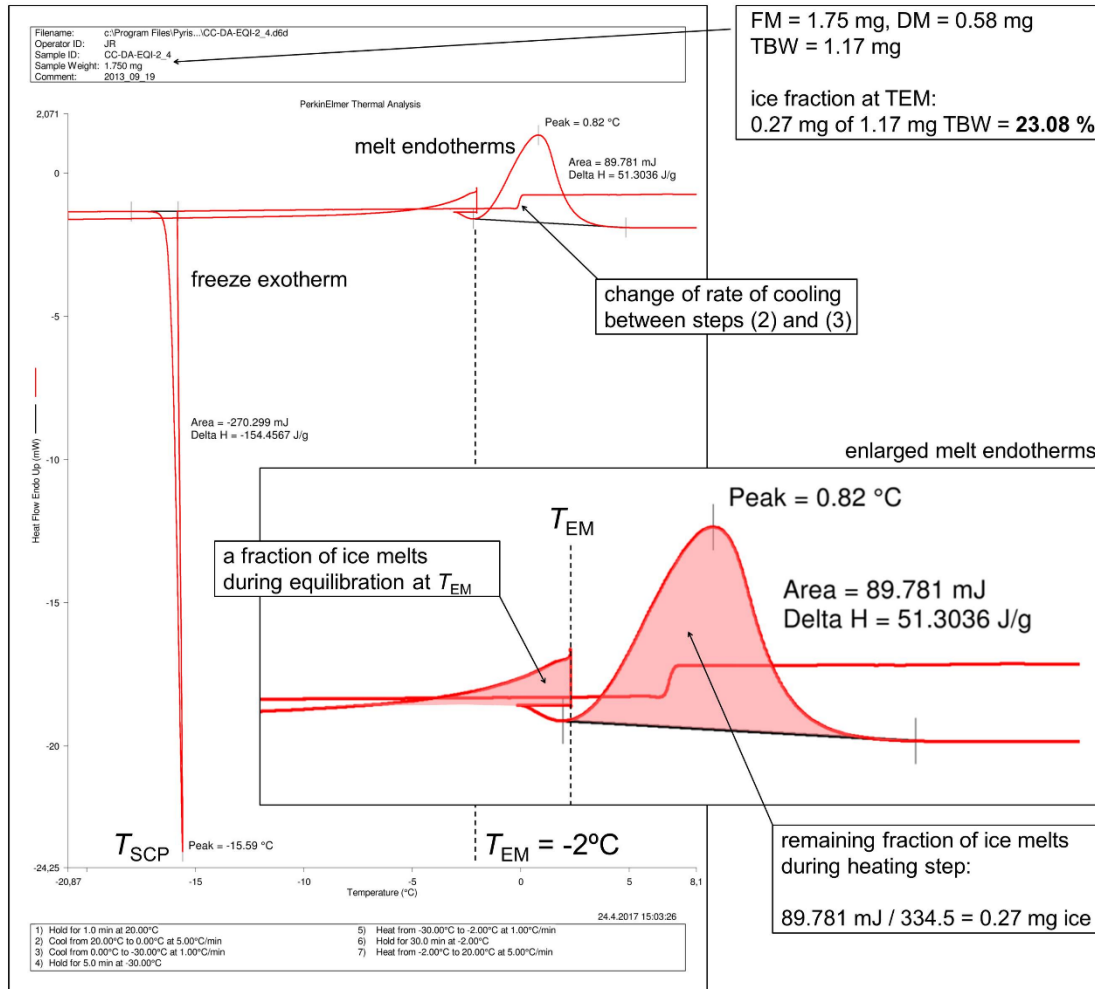

**Fig. S5. Equi-melt thermal analysis: example protocol (*C. costata*, SDA).**

The *Equi-melt* temperature programme: (1) hold for 1 min at 20°C; (2) cool to 0°C at a rate 5°C min<sup>-1</sup>; (3) cool to -30°C at a rate 1°C min<sup>-1</sup>; (4) hold for 5 min at -30°C; (5) heat to *Equi-melt* temperature ( $T_{EM}$ ) at a rate 1°C min<sup>-1</sup>; (6) hold for 30 min at  $T_{EM}$ ; (7) heat to 20°C at a rate 5°C min<sup>-1</sup>.

Notes:

- steps (3 and 4): the temperature of -30°C was sufficient to reach maximum ice fraction in all treatments. We verified in preliminary experiments that neither exposing the larvae to lower temperature (down to -70°C), nor extending the time of exposure at -30°C (up to 48 hours) did further increase the ice fraction;
- steps (5 and 6): the ice fraction equilibrates to specific  $T_{EM}$  that varied from -30°C to -0.5°C (in addition,  $T_{EM}$  of -50°C was analyzed for *C. costata* SDA variant, see Fig. S7 C);
- step (7): the ice fraction was calculated from the area under melt endotherm using the value of  $\Delta H = 334.5 \text{ J g}^{-1}$  as the enthalpy of ice/water transition.

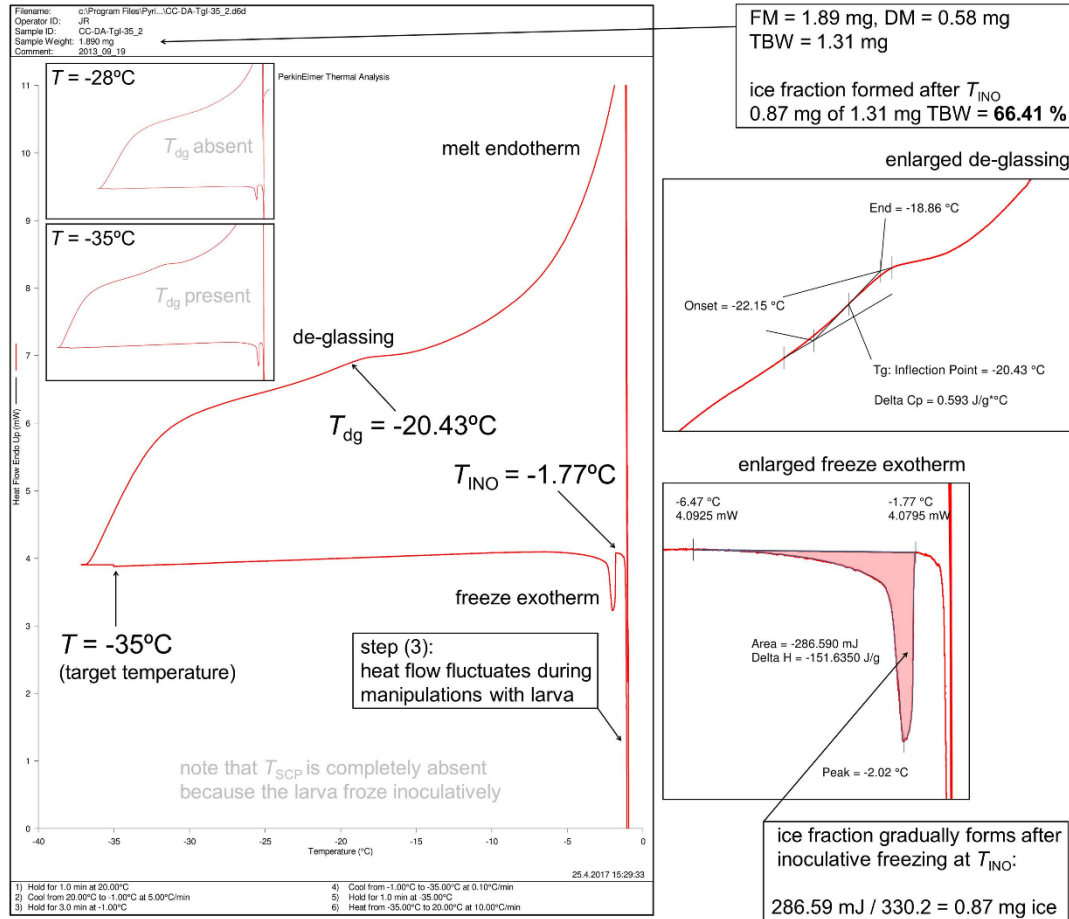

**Fig. S6. Ino-freeze thermal analysis: example protocol (*C. costata*, SDA).**

The *Ino-freeze* temperature programme: (1) hold for 1 min at 20°C; (2) cool to -1°C at a rate 5°C min<sup>-1</sup>; (3) hold for 3 min -1°C and, meanwhile, open the instrument and insert aluminum pan bottom lined with filter paper disc (SS-033, Wescor) to which 10 µL of distilled water was applied and then submerged in liquid nitrogen to freeze it. Next, after the bottom of test-pan equilibrates to programmed temperature of -1°C (approximately within 10 sec), add larva, cover the bottom loosely with lid and close the instrument; (4) cool to target temperature at a rate 0.1°C min<sup>-1</sup>; (5) hold for 1 min at target temperature; (6) heat to 20°C at a fast rate 10°C min<sup>-1</sup>.

**Notes:**

steps (1 and 2): performed with the reference pan only inside instrument;

step (3): the test pan and larva were added. When performed carefully, this critical step ensures that all larvae are exposed to external ice crystals at exactly -1°C;

steps (4 and 5): the target temperature can be varied in order to see whether or not the de-glassing transition ( $T_{dg}$ ) occurs upon rapid heating back to 20°C [when it occurs, it indicates that the vitrification transition ( $T_g$ ) must have occurred during previous slow cooling to target temperature. Otherwise, glass transition is not observable by DSC method at slow cooling rates]. However, observing only the specific aim of inoculative ice fraction analysis, the target temperature of -10°C would be sufficient as all larval freeze exotherms ended between -3°C and -5°C (see data in Fig. S11). The ice fraction was calculated from freeze exotherms and the enthalpy of water/ice transition ( $\Delta H$ ) was modified according to the exact peak temperature of inoculative freezing ( $T_{INO} = -2.02^\circ\text{C}$  in this example) using the formula:

$$\Delta H = 334.5 + 2.12 T_{INO} + 0.0042 (T_{INO})^2 = 330.2 \quad (\text{Wang and Weller, 2011})$$

step (6): the fast rate of heating (10°C min<sup>-1</sup>) facilitates the observation of de-glassing ( $T_{dg}$ ) transition.



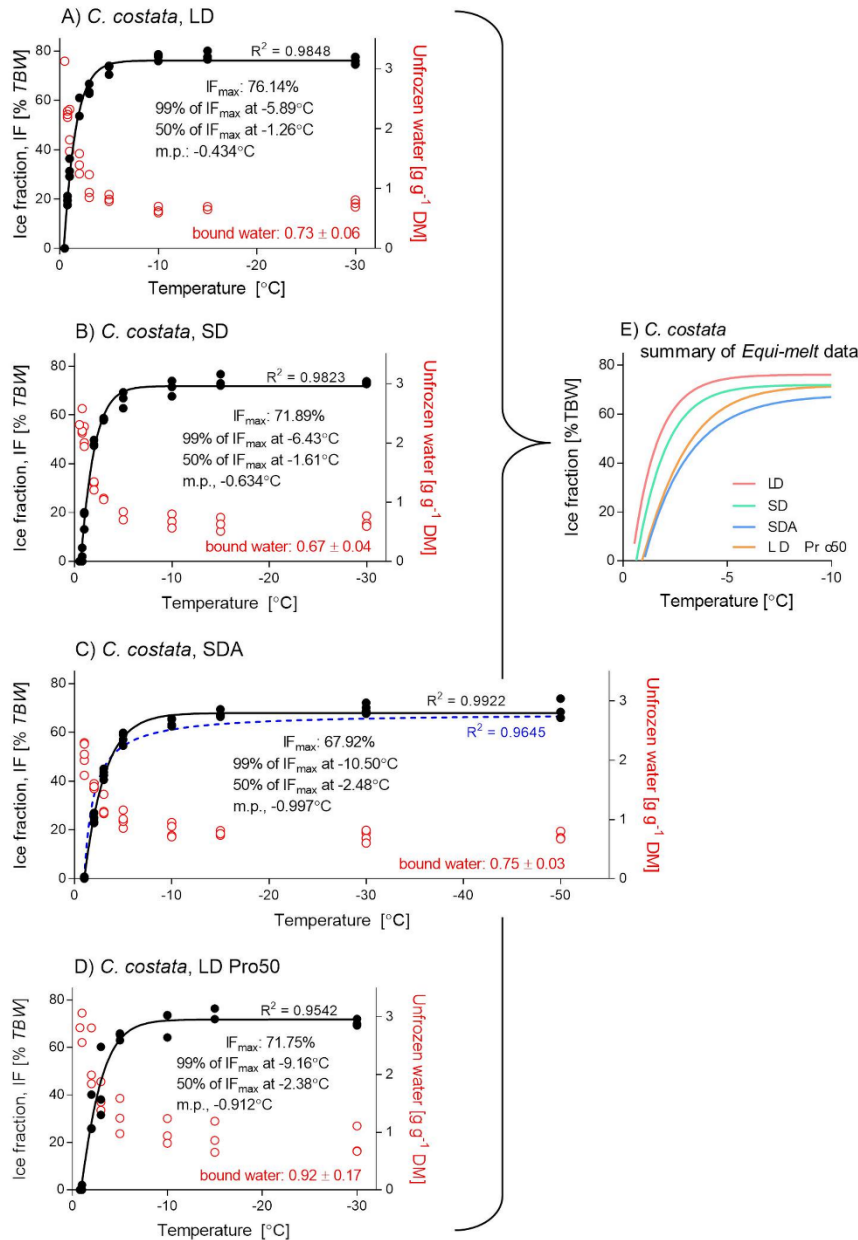

**Fig. S7. Summary of Equi-melt data for *Chymomyza costata***

The *Equi-melt* thermal analyses were run with different target temperatures ( $T$ ) ranging between  $-0.5^{\circ}\text{C}$  and  $-30^{\circ}\text{C}$  (or  $-50^{\circ}\text{C}$  in SDA variant). At least three larvae were analyzed for each experimental variant (A-D) and target temperature combination (three data-points). The Boltzmann sigmoids were fitted to empirical data (black solid lines). For comparison, an example of a theoretical freezing curve (dashed blue line) vs. Boltzmann sigmoid fitting is shown in (C):

theoretical freezing curve (Wang and Weller., 2011):  $\text{IF} = \text{OAW} * (1 - (\text{m.p.}/T))$

Boltzmann sigmoid:  $\text{IF} = \text{OAW} + (\text{top} - \text{OAW}) / (1 + \exp((V50 - x) / \text{slope}))$

All other parameters ( $\text{IF}_{\text{max}}$ ; 99% of  $\text{IF}_{\text{max}}$ ; 50% of  $\text{IF}_{\text{max}}$ ; m.p.) were derived from Boltzmann sigmoids. The amount of unfrozen water per mg DM for each larva is shown as red circle. Bound water (OIW) is calculated as a bottom of a Boltzmann sigmoid fitted to unfrozen water data.

(E) A summary figure showing only the *Equi-melt* curves for each treatment (these lines are used in Fig. 2A).

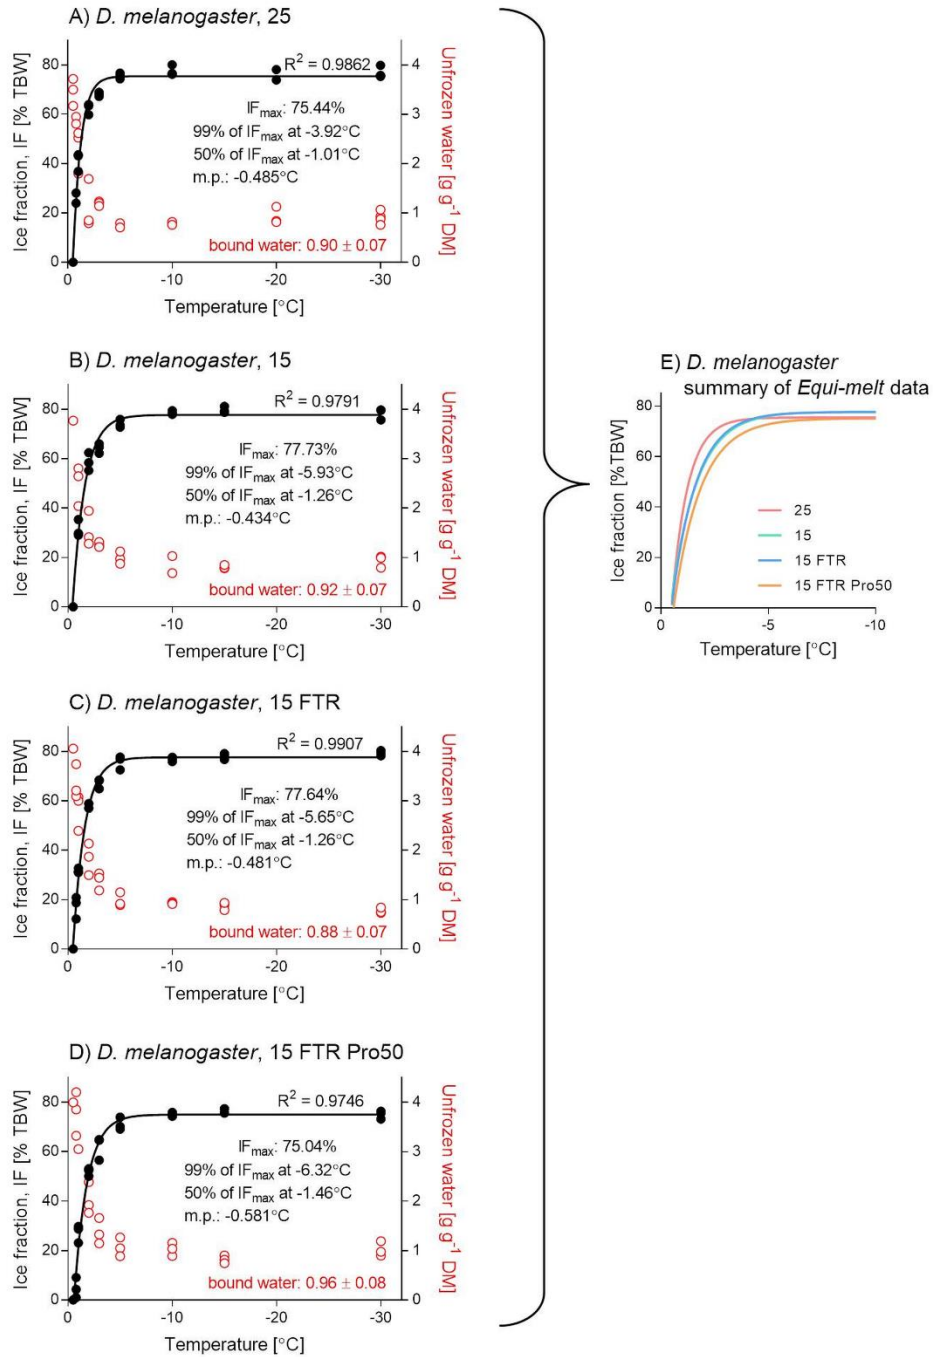

**Fig. S8. Summary of Equi-melt data for *Drosophila melanogaster*.**

All descriptions as in Fig. S7.

(E) A summary figure showing only the Equi-melt curves for each treatment (these lines are used in Fig. 2E).

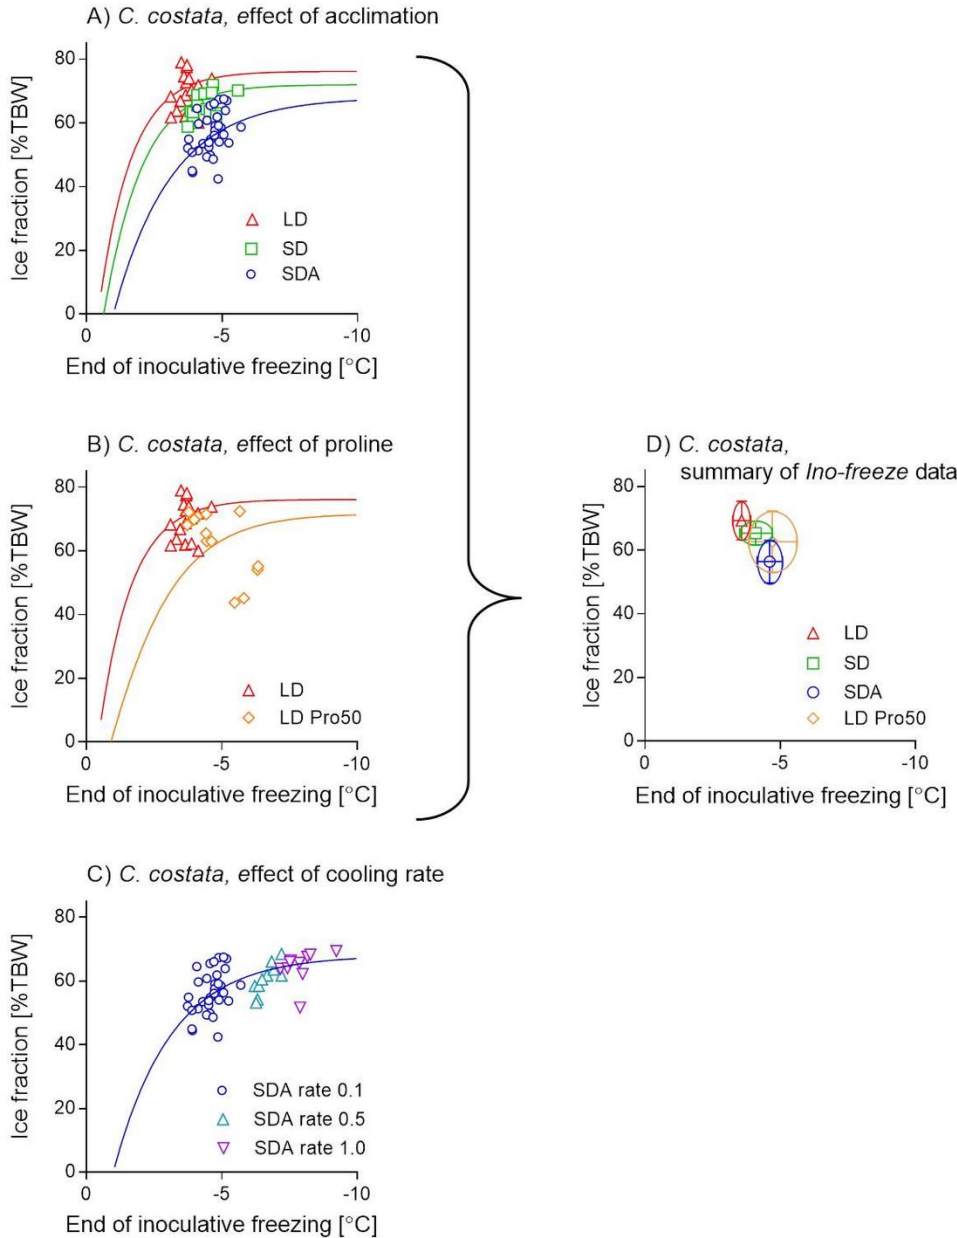

**Fig. S9. Summary of *Ino-freeze* data for *Chymomyza costata*.**

The *Ino-freeze* thermal analyses were run for individual larvae (points). Detailed results of *Ino-freeze* analyses are summarised in Fig. S11. *Equi-melt* curves (taken from Fig. S7) are also shown in order to allow direct comparison of the ice fraction analyzed by two methods. Note that *Ino-freeze* points and *Equi-melt* lines match very well. (A) Three acclimation variants (treatments LD, SD, SDA). (B) The effect of proline augmented diet (LD vs. LD Pro50). (C) The effect of cooling rate during the step (ii.) of freezing protocol. Three different cooling rates were compared:  $0.1^{\circ}\text{C min}^{-1}$ ;  $0.5^{\circ}\text{C min}^{-1}$ ;  $1^{\circ}\text{C min}^{-1}$ . The points express the ice fraction calculated from area under inoculative freeze exotherm at a temperature corresponding to the end of inoculative freezing (see Fig. S6). (D) A summary figure showing ellipses based on mean  $x \pm \text{S.D.}$  and mean  $y \pm \text{S.D.}$  values of all *Ino-freeze* data points for each treatment (these ellipses are used in Fig. 2A).

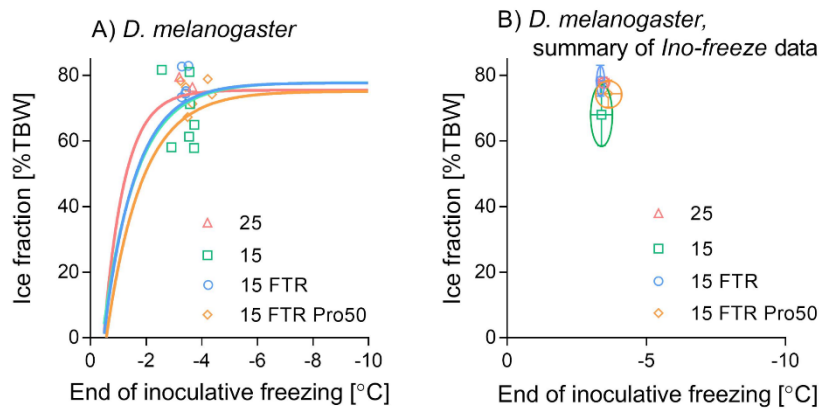

**Fig. S10. Summary all *Ino-freeze* data for *Drosophila melanogaster***

All descriptions as in Fig. S9.

(B) A summary figure showing ellipses based on mean  $x \pm$  S.D. and mean  $y \pm$  S.D. values of all *Ino-freeze* data points for each treatment (these ellipses are used in Fig. 2E).

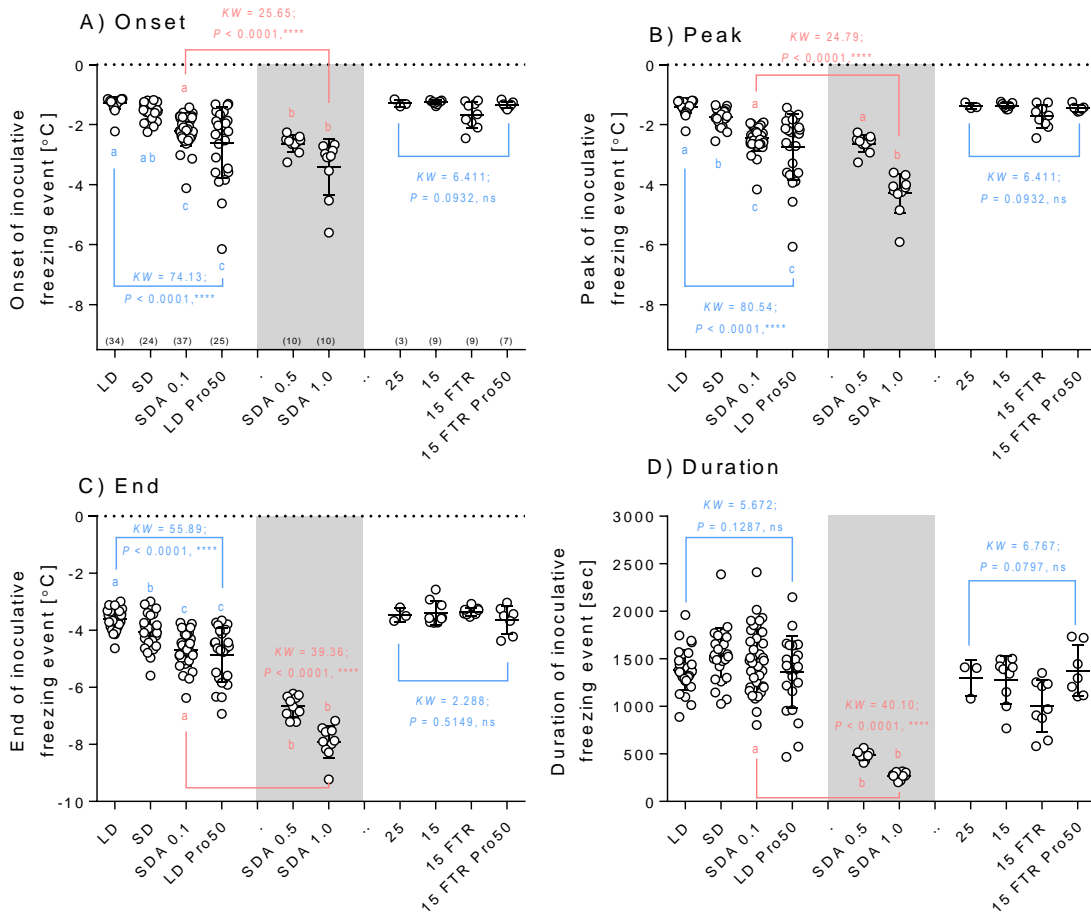

**Figure S11. Summary of data obtained by *Ino-freeze* thermal analyses.**

The parameters of inoculative freezing event [onset ( $= T_{INO}$ ), peak, end, and duration; see Fig. S6 for more explanations] in variously treated larvae of *C. costata* (LD, SD, SDA, LD Pro50) and *D. melanogaster* (25, 15, 15 FTR, 15 FTR Pro50). In addition, the effect of cooling rate during the step (ii.) of freezing protocol was analyzed in *C. costata*. Three different cooling rates were compared:  $0.1^{\circ}\text{C min}^{-1}$ ;  $0.5^{\circ}\text{C min}^{-1}$ ;  $1^{\circ}\text{C min}^{-1}$ . Each point represents single thermal analysis (single larva). Number of larvae analyzed in each treatment (n) is shown in parentheses in (A). Note that there is a good match between the data on onset of inoculative freezing analyzed by DSC (Fig. S11 A) and similar data recorded directly by thermocouples in freeze-tolerance assays (Fig. S1 F). The differences between treatments (shown by blue and red lines) were assessed using Kruskal-Wallis nonparametric test (KW statistics is shown) followed by Dunn's multiple comparison test. Treatments flanked by different letter were statistically different according to the Dunn's test.

## References

- Block, W., Bauer, R.** (2000). DSC studies of freezing in terrestrial enchytraeids (Annelida: Oligochaeta). *CryoLett.* **21**, 99-106.
- Block, W., Wharton, D.A. and Sinclair, B.J.** (1998). Cold tolerance of a New Zealand alpine cockroach, *Celatoblatta quinquemaculata*. *Physiol. Entomol.* **23**, 1-6.
- Gehrken, U., Southon, T.E.** (1997). Effect of temperature on cold-hardiness and tissue ice formation in the adult chrysomelid beetle *Melasoma collaris* L. *J. Insect Physiol.* **43**, 587-593.
- Halberg, K.A., Persson, D., Ramlov, H., Westh, P., Kristensen, R.M. and Mobjerg, N.** (2009). Cyclomorphosis in Tardigrada: adaptation to environmental constraints. *J. Exp. Biol.* **212**, 2803-2811.
- Hengherr, S., Worland, M.R., Reuner, A., Brümmer, F. and Schill, R.O.** (2009). Freeze tolerance, supercooling points and ice formation: comparative studies on the subzero temperature survival of limno-terrestrial tardigrades. *J. Exp. Biol.* **212**, 802-807.
- Košťál, V., Zahradníčková, H. and Šimek, P.** (2011). Hyperprolinemic larvae of the drosophilid fly, *Chymomyza costata*, survive cryopreservation in liquid nitrogen. *Proc. Natl. Acad. Sci. USA* **108**, 13035-13040.
- Košťál, V., Korbelová, J., Štětina, T., Poupardin, R., Colinet, H., Zahradníčková, H., Opekarová, I., Moos, M. and Šimek, P.** (2016). Physiological basis for low-temperature survival and storage of quiescent larvae of the fruit fly *Drosophila melanogaster*. *Sci. Rep.* **6**, 32346.
- Lee Jr., R. E., Lewis E. A.** (1985). Effect of temperature and duration of exposure on tissue ice formation in the gall fly *Eurosta solidaginis* (Diptera, Tephritidae). *Cryo-Lett.* **6**, 25-34.
- Patricio Silva, A.L., Holmstrup, M., Kostal, V. and Amorim, M.J.B.** (2013). Soil salinity increases survival of freezing in the enchytraeid *Enchytraeus albidus*. *J. Exp. Biol.* **213**, 2732-2740.
- Ramlov, H., Westh, P.** (1993). Ice formation in the freeze-tolerant Alpine weta *Hemideina maori* Hutton (Orthoptera, Stenopelmatidae). *Cryo-Lett.* **14**, 169-176.
- Wang, L., Weller, C.L.** (2011) Thermophysical properties of frozen foods. In *Handbook of Frozen Food Processing and Packaging*, 2nd edition (ed. D.-W. Sun), pp. 101-125. Boca Raton: CRC Press.
- Wharton, D. A., Block, W.** (1997). Differential scanning calorimetry studies on an Antarctic nematode (*Panagrolaimus davidi*) which survives intracellular freezing. *Cryobiol.* **34**, 114-121.
- Worland, M.R., Block, W. and Grubor-Lajsic, G.** (2000). Survival of *Heleomyza borealis* (Diptera, Heleomyzidae) larvae down to -60°C. *Physiol. Entomol.* **25**, 1-5.
- Zachariassen, K.E., Hammel, H.T. and Schmidek, W.** (1979). Osmotically inactive water in relation to tolerance to freezing in *Eleodes blanchardi* beetles. *Comp. Biochem. Physiol. A* **63**, 203-206.
